# Supplementary material
Source: PubMed Central journal article supplement (PMC9892360)
Supplement: NIHMS1827600-supplement-Supp_Figures.pdf [file NIHMS1827600-supplement-Supp_Figures.pdf]

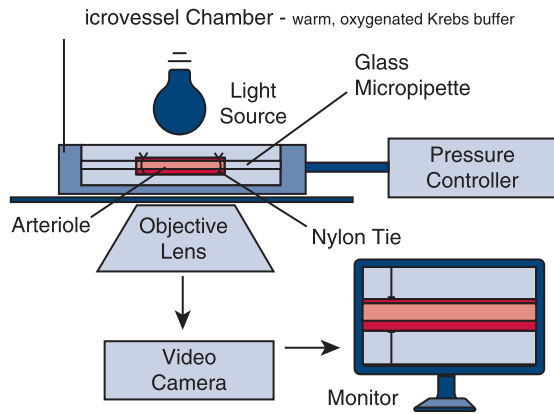

**FIGURE E1.** Set-up for myogenic tone measurements. Human coronary arterioles from harvested atrial tissue samples were dissected using a dissecting microscope. Arterioles were placed in a microvessel chamber containing circulating warm, oxygenated Krebs buffer. Arterioles were cannulated with dual glass micropipettes and secured with 10-0 nylon monofilament suture. Vessels were pressurized to 20 to 120 mm Hg using a pressure controller connected to the glass micropipette. With an inverted microscope connected to a video camera, the vessel image was projected onto a television monitor. An electronic dimension analyzer was used to measure the internal lumen diameter.

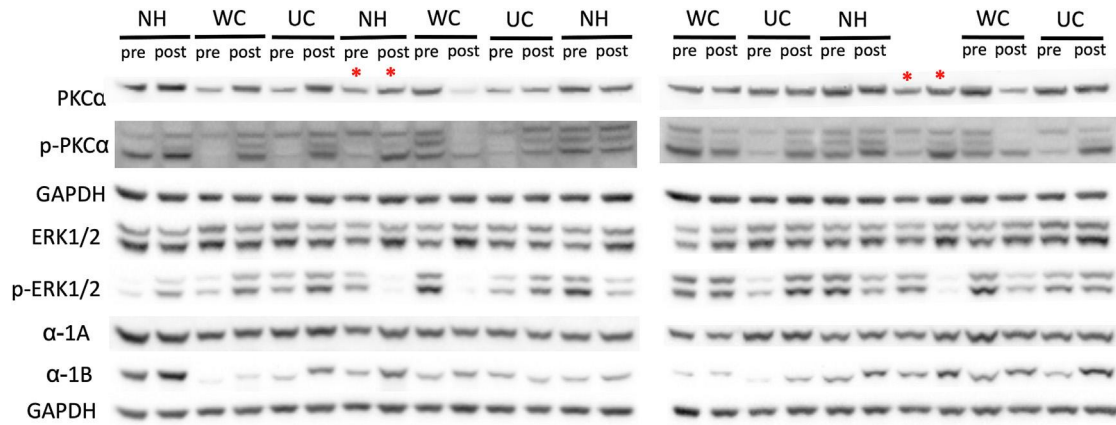

**FIGURE E2.** Western blot images. Complete western blot images for expression of PKC $\alpha$ , phosphorylated PKC $\alpha$ , ERK1/2, p-ERK1/2,  $\alpha$ -1A adrenergic receptor, and  $\alpha$ -1B adrenergic receptor. Glyceraldehyde-3-phosphate dehydrogenase was used as a loading control. Given the quantity of samples, western blot was run across 2 membranes as indicated by space in between images. Two samples were replicated in the same location across both membranes as indicated by \* to correct for intermembrane differences. *NH*, No hypertension; *WC*, well-controlled hypertension; *UC*, uncontrolled hypertension; *PKC $\alpha$* , protein kinase C alpha; *p-PKC $\alpha$* , phosphorylated PKC alpha; *GAPDH*, glyceraldehyde-3-phosphate dehydrogenase; *ERK1/2*, extracellular signal-regulated kinase 1/2; *p-ERK1/2*, phosphorylated ERK1/2.
